# Supplementary material for: A first global height-resolved cloud condensation nuclei data set derived from spaceborne lidar measurements
Source: Copernicus journal article supplement (doi:10.5194/essd-15-3747-2023), 2023-08-22
Supplement: Supplementary file 1 [file essd-15-3747-2023-supplement.pdf]

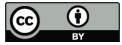

*Supplement of*

## **A first global height-resolved cloud condensation nuclei data set derived from spaceborne lidar measurements**

**Goutam Choudhury and Matthias Tesche**

*Correspondence to:* Goutam Choudhury ([goutam.choudhury@biu.ac.il](mailto:goutam.choudhury@biu.ac.il))

The copyright of individual parts of the supplement might differ from the article licence.

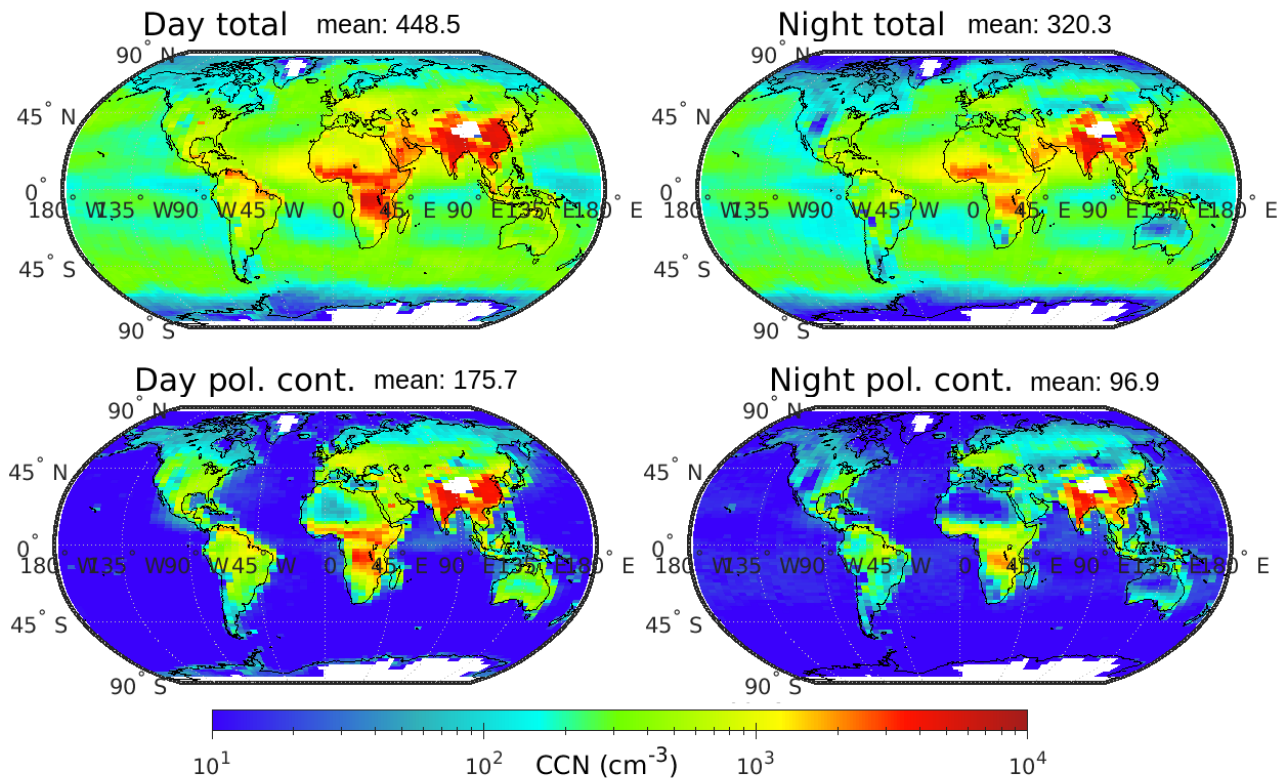

Figure S1: CCN daytime (left column) and nighttime (right column) climatology estimated using more than 15 years of CALIPSO level 2 aerosol profile product (June 2006 to December 2021). The top and bottom row represents the total CCN and polluted continental CCN concentrations, respectively.

## S1 MATLAB plotting routines

### S1.1 Codes for re-producing Figure 2

```

%% Figure 2
clc,clear,close all
% model data
model_path = 'surface_global_models_year2011.hdf';
mlat = double(hdfread(model_path, '/lat'));
mlon = double(hdfread(model_path, '/lon'));
mCCN = read_ccn_model(model_path);
mCCN_med = nanmedian(mCCN,3);
mCCN_max = nanmax(mCCN,[],3);
mCCN_min = nanmin(mCCN,[],3);

% CALIOP data
caliop_path = 'CCN_monthly_cloudfree_2011_8km.nc';
clat = double(ncread(caliop_path,'lat'));
clon = double(ncread(caliop_path,'lon'));
calt = double(ncread(caliop_path,'altitude'));
cCCN = double(ncread(caliop_path,'CCN'));
cN = double(ncread(caliop_path,'N'));
% annual average
cCCN1 = nansum(cCCN.*cN,4)./nansum(cN,4); % yearly average
% average CCN between altitudes of 0.5 and 1 km

```

```

cCCN1 = squeeze(nanmean(cCCN1(:,:,calt<1 & calt>0.5),3));

% Regrid model data to CALIOP grid
[mlong,mlatg]=meshgrid(mlon,mlat);
[clong,clatg]=meshgrid(clon,clat);
mCCN_medc = interp2(mlong,mlatg,mCCN_med,clong,clatg);
mCCN_maxc = interp2(mlong,mlatg,mCCN_max,clong,clatg);
mCCN_minc = interp2(mlong,mlatg,mCCN_min,clong,clatg);
%%
close all
cm = customcolormap([0,0.15,0.3,0.5,0.65,0.85,1],
{'#a31d1b','#ff1300','#ffb02','#70ff00','#00ff3','#31b1b9','#3a01fb'});
clims = [10,1e4];
load coastlines.mat
%define size of subplots
xx = 11; yy=6.5;
f1 = figure('units','centimeters','position',[1,1,28.5,14.5]);
ax1 = axes('units','centimeters','position',[1,7,xx,yy]);
axis tight
% axesm('MapProjection','robinson');
worldmap('world')
pcolor(mclat,mclon,cCCN1,'LineStyle','none')
plotm(coastlat,coastlon,'k');
set(gca,'ColorScale','log')
colormap(cm);
colorbar('off');
% cb.TickDirection= 'both'; cb.Ticks = [100,300,1000,3000,10000];
clim(clims)
text(0.01,1.1,'(a) CALIOP','FontSize',15,'units','normalized')
box off
ax2 = axes('units','centimeters','position',[13.5,7,xx,yy]);
axis tight
worldmap('world')
pcolor(mclat,mclon,mCCN_medc,'LineStyle','none')
plotm(coastlat,coastlon,'k');
set(gca,'ColorScale','log')
colormap(cm);
colorbar('off');
clim(clims)
text(0.01,1.1,'(b) Models median','FontSize',15,'units','normalized')

ax3 = axes('units','centimeters','position',[1,0,xx,yy]);
axis tight
worldmap('world')
pcolor(mclat,mclon,mCCN_maxc,'LineStyle','none')
plotm(coastlat,coastlon,'k');
set(gca,'ColorScale','log')
colormap(cm);
colorbar('off')
clim(clims)
text(0.01,1.1,'(c) Models maximum','FontSize',15,'units','normalized')

ax4 = axes('units','centimeters','position',[13.5,0,xx,yy]);
axis tight
worldmap('world')
pcolor(mclat,mclon,mCCN_minc,'LineStyle','none')
plotm(coastlat,coastlon,'k');

```

```

set(gca,'ColorScale','log')
colormap(cm);
clim(clims)
% colorbar(ax4a,'off')
text(0.01,1.1,'(d) Models minimum','FontSize',15,'units','normalized')
%%%%%%%%%%%%%%%%%%%%%%%%%%%%%%%%%%%%%%%%%%%%%%%%%%%%%%%%%%%%%%%%%%%%%%%% colorbar %%%%%%%%%%%%%%%
cb = colorbar(ax4);
ylabel(cb,'n_{CCN} (cm^{-3}) ss=0.2 %','FontSize',16)
cb.TickDirection= 'both'; cb.Ticks = [10,30,100,300,1000,3000,10000];
cb.Position = cb.Position+[0.065,0.2,0,0.2];
saveas(f1,'fig02.png')

```

## S1.2 Codes for re-producing Figure 3

```

% Figure 3
clc,clear,close all
% load the climatology data
file_path = 'CCN_climatology_cloudfree_8km.nc';
lat = double(ncread(file_path,'lat'));
lon = double(ncread(file_path,'lon'));
altitude = double(ncread(file_path,'altitude'));
CCN = double(ncread(file_path,'CCN_cl'));
CCN_d = double(ncread(file_path,'CCN_cl_d'));
CCN_m = double(ncread(file_path,'CCN_cl_m'));
CCN_es = double(ncread(file_path,'CCN_cl_es'));
CCN_pc = double(ncread(file_path,'CCN_cl_pc'));

% altitude < 2
altid = altitude>0 & altitude<2;
% average for a altitude < 2 km
aCCN= nanmean(CCN(:,:,altid),3);
aCCN_d = nanmean(CCN_d(:,:,altid),3);
aCCN_m = nanmean(CCN_m(:,:,altid),3);
aCCN_es = nanmean(CCN_es(:,:,altid),3);
aCCN_pc = nanmean(CCN_pc(:,:,altid),3);

% land ocean separate
load coastlines.mat
[latgr,longr] = meshgrid(lat,lon);
[land_id] = inpolygon(longr(:),latgr(:),coastlon,coastlat);
land_id = reshape(land_id,size(latgr));
cal_land_id = repmat(land_id,1,1,size(CCN,3));
%%
close all

cm = customcolormap([0,0.15,0.3,0.5,0.65,0.85,1],
{'#a31d1b','#ff1300','#fffb02','#70ff00','#00fff3','#31b1b9','#3a01fb'});
clims = [10,1e4];
xx = 9; yy=5; x0 = 11; y0 = 13;
x1 = [6,16.5]; y1 = [6.5,0.8];
f2 = figure('units','centimeters','position',[1,1,31.5,19]);
ax0 = axes('units','centimeters','position',[x0,y0,xx,yy]);
axis tight
worldmap('world')
pcolorm(lat,lon,aCCN,'LineStyle','none')
plotm(coastlat,coastlon,'k');

```

```

set(gca,'ColorScale','log')
colormap(cm);
colorbar('off');
% cb.TickDirection= 'both'; cb.Ticks = [100,300,1000,3000,10000];
caxis(clims)
text(0.01,1.1,'(a) Total CCN','FontSize',15,'units','normalized')
%%%%%%%%%%%%
ax1 = axes('units','centimeters','position',[x1(1),y1(1),xx,yy]);
axis tight
worldmap('world')
pcolorm(lat,lon,aCCN_d,'LineStyle','none')
plotm(coastlat,coastlon,'k');
set(gca,'ColorScale','log')
colormap(cm);
colorbar('off');
% cb.TickDirection= 'both'; cb.Ticks = [100,300,1000,3000,10000];
caxis(clims)
text(0.01,1.1,'(b) Dust CCN','FontSize',15,'units','normalized')

ax2 = axes('units','centimeters','position',[x1(2),y1(1),xx,yy]);
axis tight
worldmap('world')
pcolorm(lat,lon,aCCN_pc,'LineStyle','none')
plotm(coastlat,coastlon,'k');
set(gca,'ColorScale','log')
colormap(cm);
colorbar('off');
caxis(clims)
text(0.01,1.1,'(c) Polluted continental CCN','FontSize',15,'units','normalized')

ax3 = axes('units','centimeters','position',[x1(1),y1(2),xx,yy]);
axis tight
worldmap('world')
pcolorm(lat,lon,aCCN_m,'LineStyle','none')
plotm(coastlat,coastlon,'k');
set(gca,'ColorScale','log')
colormap(cm);
colorbar('off')
caxis(clims)
text(0.01,1.1,'(d) Marine CCN','FontSize',15,'units','normalized')

ax4 = axes('units','centimeters','position',[x1(2),y1(2),xx,yy]);
axis tight
worldmap('world')
pcolorm(lat,lon,aCCN_es,'LineStyle','none')
plotm(coastlat,coastlon,'k');
set(gca,'ColorScale','log')
colormap(cm);
caxis(clims)
% colorbar(ax4a,'off')
text(0.01,1.1,'(e) Elevated smoke CCN','FontSize',15,'units','normalized')
%%%%%%%%%%%% colorbar %%%%%%%%%%%%%
cb = colorbar(ax0);
ylabel(cb,'n_{CCN} (cm^{-3}) ss=0.2 %','FontSize',13)
cb.TickDirection= 'both'; cb.Ticks = [10,30,100,300,1000,3000,10000];
cb.Position = cb.Position+[0.065,0.0,0,0.0];

```

```

%%%%%%%%%% Add profiles %%%%%%%%%%
%%
xx1 = 4; yy1=5; dy = 0.3;
ax11 = axes('units','centimeters','position',[x0-xx1-1,y0+dy,xx1,yy1-0.5]);
pp = plot_cal_profile(CCN,altitude,cal_land_id);
legend(pp,{'Globe','Land','Ocean'},'FontSize',10)
text(0.02,0.93,'(a1)','FontSize',10,'units','normalized')
axes('units','centimeters','position',[x1(1)-xx1-1,y1(1)+dy,xx1,yy1-0.5]);
plot_cal_profile(CCN_d,altitude,cal_land_id);
xlabel("")
text(0.02,0.93,'(b1)','FontSize',10,'units','normalized')
axes('units','centimeters','position',[x1(2)+xx+1,y1(1)+dy,xx1,yy1-0.5]);
plot_cal_profile(CCN_pc,altitude,cal_land_id);
ylabel(""); xlabel("")
text(0.02,0.93,'(c1)','FontSize',10,'units','normalized')

axes('units','centimeters','position',[x1(1)-xx1-1,y1(2)+dy,xx1,yy1-0.5]);
plot_cal_profile(CCN_m,altitude,cal_land_id);
text(0.02,0.93,'(d1)','FontSize',10,'units','normalized')

axes('units','centimeters','position',[x1(2)+xx+1,y1(2)+dy,xx1,yy1-0.5]);
plot_cal_profile(CCN_es,altitude,cal_land_id);
ylabel("")
text(0.02,0.93,'(e1)','FontSize',10,'units','normalized')
saveas(f2,'fig03.png')

```

### S1.3 Codes for re-producing Figure 4

```

clc,clear,close all
% load the climatology data
file_path = 'CCN_climatology_cloudfree_8km.nc';
lat = double(ncread(file_path,'lat'));
lon = double(ncread(file_path,'lon'));
altitude = double(ncread(file_path,'altitude'));
CCN.tot = double(ncread(file_path,'CCN_cl_sn'));
CCN.d = double(ncread(file_path,'CCN_cl_sn_d'));
CCN.es = double(ncread(file_path,'CCN_cl_sn_es'));
CCN.m = double(ncread(file_path,'CCN_cl_sn_m'));
CCN.pc = double(ncread(file_path,'CCN_cl_sn_pc'));
% separate the seasons for each aerosol type
type = {'tot','d','pc','m','es'};
for i=1:numel(type) % 4 seasons
    winter.(type{i}) = CCN.(type{i})(:,:,1);
    spring.(type{i}) = CCN.(type{i})(:,:,2);
    summer.(type{i}) = CCN.(type{i})(:,:,3);
    autumn.(type{i}) = CCN.(type{i})(:,:,4);
end

% crop w.r.t altitude
nCCN_cl_sn_a = squeeze(nanmean(CCN.tot(:,:,altitude>0 & altitude<2,:),3));
%%
close all
cm = customcolormap([0,0.15,0.3,0.5,0.65,0.85,1],
{'#a31d1b','#ff1300','#ffb02','#70ff00','#00fff3','#31b1b9','#3a01fb'});
clims = [10,1e4];
xx = 9; yy=5;

```

```

x1 = [6,16.5]; y1 = [7.5,1.5];
f3 = figure('units','centimeters','position',[1,1,31.5,14]);
ax1 = axes('units','centimeters','position',[x1(1),y1(1),xx,yy]);
axis tight
worldmap('world')
pcolor(lat,lon,squeeze(nCCN_cl_sn_a(:,:,1)),'LineStyle','none')
plotm(coastlat,coastlon,'k');
set(gca,'ColorScale','log')
colormap(cm);
colorbar('off');
% cb.TickDirection= 'both'; cb.Ticks = [100,300,1000,3000,10000];
clim(clims)
text(0.01,1.1,'(a) Winter (DJF)','FontSize',15,'units','normalized')

ax2 = axes('units','centimeters','position',[x1(2),y1(1),xx,yy]);
axis tight
worldmap('world')
pcolor(lat,lon,squeeze(nCCN_cl_sn_a(:,:,2)),'LineStyle','none')
plotm(coastlat,coastlon,'k');
set(gca,'ColorScale','log')
colormap(cm);
colorbar('off');
caxis(clims)
text(0.01,1.1,'(b) Spring (MAM)','FontSize',15,'units','normalized')

ax3 = axes('units','centimeters','position',[x1(1),y1(2),xx,yy]);
axis tight
worldmap('world')
pcolor(lat,lon,squeeze(nCCN_cl_sn_a(:,:,3)),'LineStyle','none')
plotm(coastlat,coastlon,'k');
set(gca,'ColorScale','log')
colormap(cm);
colorbar('off')
caxis(clims)
text(0.01,1.1,'(c) Summer (JJA)','FontSize',15,'units','normalized')

ax4 = axes('units','centimeters','position',[x1(2),y1(2),xx,yy]);
axis tight
worldmap('world')
pcolor(lat,lon,squeeze(nCCN_cl_sn_a(:,:,4)),'LineStyle','none')
plotm(coastlat,coastlon,'k');
set(gca,'ColorScale','log')
colormap(cm);
caxis(clims)
text(0.01,1.1,'(d) Autumn (SON)','FontSize',15,'units','normalized')
%%%%%%%%%%%%%%%%%%%%%%%%%%%%%%%%%%%%%%%%%%%%%%%%%%%%%%%%%%%%%%%%%%%%%%%% colorbar %%%%%%%%%%%%%%
cb = colorbar(ax4,'southoutside');
text(-0.21,-0.07,'n_{CCN} (cm^{-3})','FontSize',12,'Units','normalized')
cb.TickDirection= 'both'; cb.Ticks = [10,30,100,300,1000,3000,10000];
cb.Position = cb.Position+[-0.27,-0.12,0.2,0];

%%%%%%%%%%%%%%%%%%%%%%%%%%%%%%%%%%%%%%%%%%%%%%%%%%%%%%%%%%%%%%%%%%%%%%%% ADD profiles %%%%%%%%%%%%%%
%%%%%%%%%%%%%%%%%%%%%%%%%%%%%%%%%%%%%%%%%%%%%%%%%%%%%%%%%%%%%%%%%%%%%%%%
xx1 = 4; yy1=5; dy = 0.3;
clear pp
axes('units','centimeters','position',[x1(1)-xx1-1,y1(1)+dy,xx1,yy1-0.5]);
pp = plot_cal_profile_type(winter,altitude);

```

```

legend(pp,{ 'Total','Dust','Poll. Cont.','Marine','Smoke'},'FontSize',10)
xlabel("")
text(0.02,0.93,'(a1)','FontSize',10,'units','normalized')
axes('units','centimeters','position',[x1(2)+xx+1,y1(1)+dy,xx1,yy1-0.5]);
plot_cal_profile_type(spring,altitude);
ylabel(""); xlabel("")
text(0.02,0.93,'(b1)','FontSize',10,'units','normalized')

axes('units','centimeters','position',[x1(1)-xx1-1,y1(2)+dy,xx1,yy1-0.5]);
plot_cal_profile_type(summer, altitude);
text(0.02,0.93,'(c1)','FontSize',10,'units','normalized')

axes('units','centimeters','position',[x1(2)+xx+1,y1(2)+dy,xx1,yy1-0.5]);
plot_cal_profile_type(autumn,altitude);
ylabel("")
text(0.02,0.93,'(d1)','FontSize',10,'units','normalized')
saveas(f3,'fig04.png')

```

## S1.4 Supporting functions

```

function [pp] = plot_cal_profile(CCN,altitude,land_id)
%
ccn_p = squeeze(mean(CCN,[1,2],'omitmissing'));
ccn_p_std = squeeze(std(CCN,0,[1,2],'omitmissing'));

ccn_land = CCN; ccn_land(~land_id)=nan;
ccn_ocean = CCN; ccn_ocean(land_id)=nan;

ccnl_p = squeeze(mean(ccn_land,[1,2],'omitmissing'));
ccno_p = squeeze(mean(ccn_ocean,[1,2],'omitmissing'));
hold on
pp(1) = plot(ccn_p,altitude,'k','LineWidth',2);
fill_line_y([ccn_p-ccn_p_std/4;flip(ccn_p+ccn_p_std/4)],...
[altitude;flip(altitude)]','k',0.2);

pp(2) = plot(ccnl_p,altitude,'--r','LineWidth',2);
pp(3) = plot(ccno_p,altitude,'--b','LineWidth',2);
ylim([0.25,8])
xlabel('CCN (cm^{-3})')
ylabel('Height (km)')
grid on
box on

end
%%%%%%%%%%%%%%%%%%%%%%%%%%%%%%%%%%%%%%%%%%%%%%%%%%%%%%%%%%%%%%%%%%%%%%%%
function [pp] = plot_cal_profile_type(ssn,altitude)

type = {'tot','d','pc','m','es'};
cc=[255,0,255;255,128,0;0,204,102;0,0,255;64,64,64]/255;
hold on
for i=1:5
    ccn_p = squeeze(mean(ssn.(type{i}),[1,2],'omitmissing'));
    pp(i) = plot(ccn_p,altitude,'color',cc(i,:), 'LineWidth',2);
    if i==1
        ccn_p_std = squeeze(std(ssn.(type{i}),0,[1,2],'omitmissing'));
        fill_line_y([ccn_p-ccn_p_std/4;flip(ccn_p+ccn_p_std/4)],...

```



```
        [altitude;flip(altitude)],cc(i,:),0.2);
    end
end
ylim([0.25,8])
xlim([0,600])
xlabel('CCN (cm-3)')
ylabel('Height (km)')
grid on
box on
end
```
